# Supplementary material
Source: HighWire-hosted journal article supplement (https://jitc.bmj.com/content/10/9/e004585)

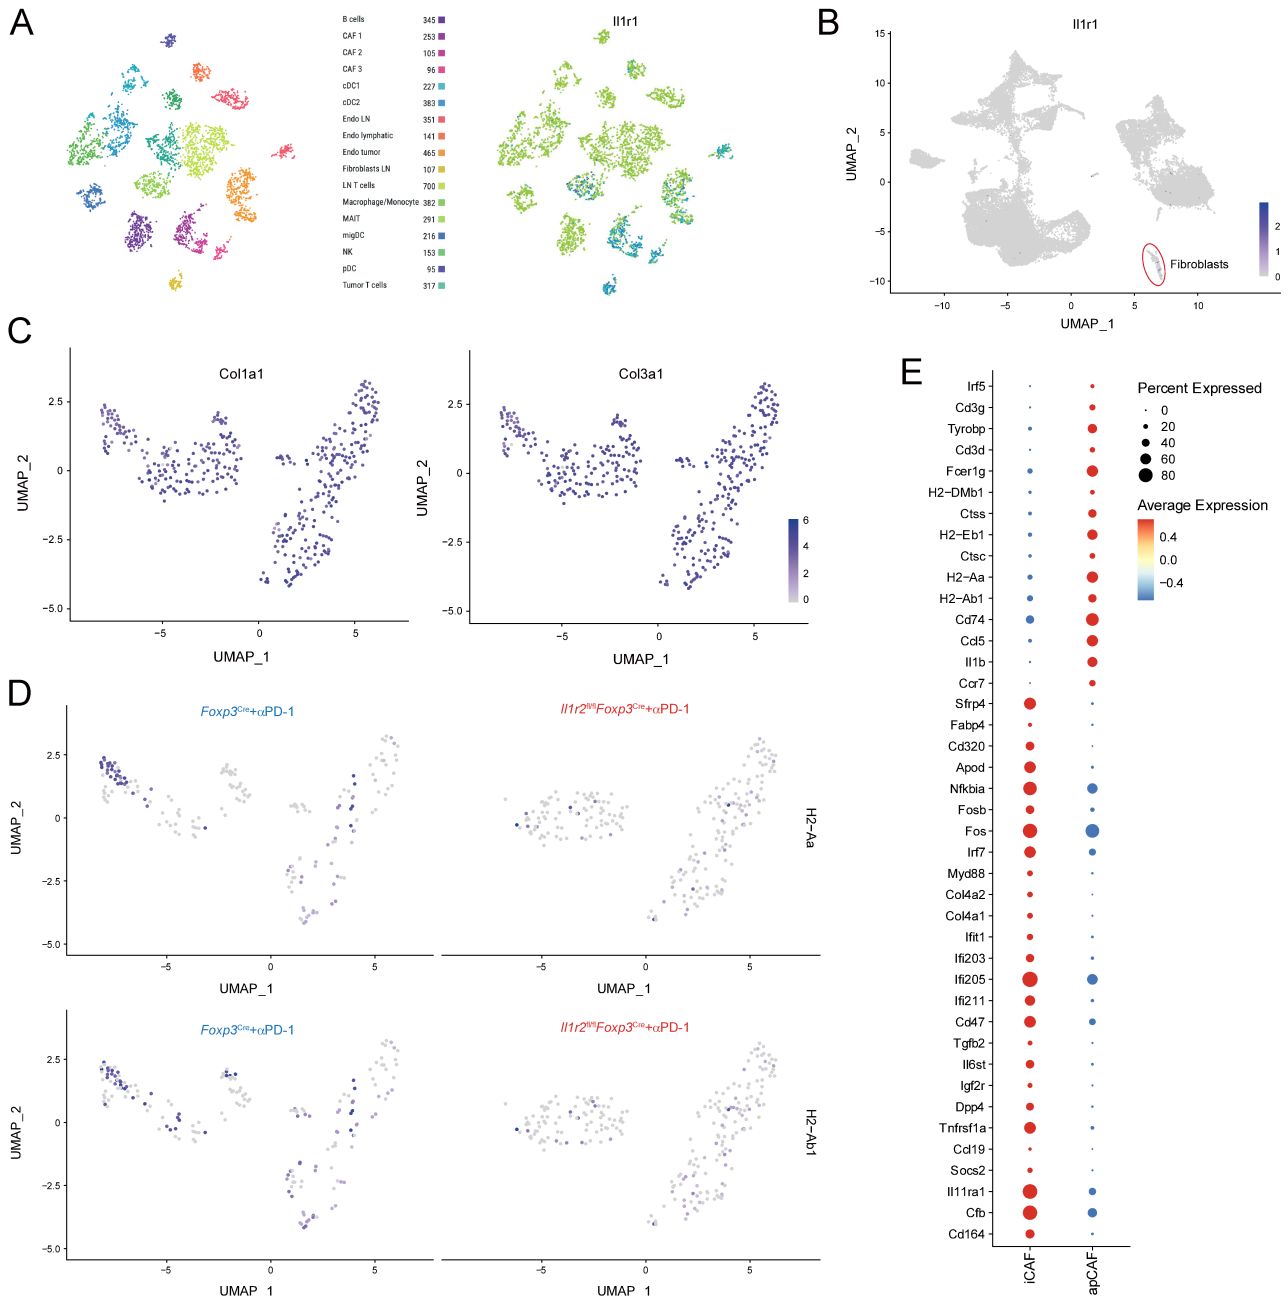

Supplement: inline-supplementary-material-5 [file inline-supplementary-material-5.pdf]
